# Supplementary material
Source: HighWire-hosted journal article supplement (https://bmjopen.bmj.com/content/6/11/e013940)
Supplement: inline-supplementary-material-4 [file inline-supplementary-material-4.pdf]

Webtable 4. Citations found on fertility centre websites, and the corresponding references identified, with the level of evidence.

| Intervention           | Website | Citation(s) as found on the website                                                                                                                                                                                                                                                                                                                                                                                                                                                                                                                                                                                                                                                                                                                                                                                                                                                                                     | Reference(s) we identified                                                                                                                                                                                                                                                                                                                                                                                                                                                                                                                                                                                                                                                                                                                                                                                                                                                                                                                                                                                                                              | Study types cited                                                                                            | Highest level of evidence cited for the claim* |
|------------------------|---------|-------------------------------------------------------------------------------------------------------------------------------------------------------------------------------------------------------------------------------------------------------------------------------------------------------------------------------------------------------------------------------------------------------------------------------------------------------------------------------------------------------------------------------------------------------------------------------------------------------------------------------------------------------------------------------------------------------------------------------------------------------------------------------------------------------------------------------------------------------------------------------------------------------------------------|---------------------------------------------------------------------------------------------------------------------------------------------------------------------------------------------------------------------------------------------------------------------------------------------------------------------------------------------------------------------------------------------------------------------------------------------------------------------------------------------------------------------------------------------------------------------------------------------------------------------------------------------------------------------------------------------------------------------------------------------------------------------------------------------------------------------------------------------------------------------------------------------------------------------------------------------------------------------------------------------------------------------------------------------------------|--------------------------------------------------------------------------------------------------------------|------------------------------------------------|
| IMSI                   | ID 71   | <p>3. Bartoov B, Berkovitz A, Eltes F, Kogosowski A, Menezo Y, Barak Y. Real-Time fine morphology of motile human sperm cells is associated with IVFICSI outcome..J Androly 2002; 23:1-8</p> <p>4. Bartoov B, Berkovitz A, Eltes F, Kogosowski A, Menezo Y, Barak Y Pregnancy rates are higher with intracytoplasmic morphologically selected sperm injection than with conventional intracytoplasmic injection.Fertil Steril 2003 Dec;80(6):1413-9.Antinori M, Licata E, Dani G, Cerusico F, Versaci C, d'Angelo D, Antinori S. Intracytoplasmic morphologically selected sperm injection: a prospective randomized trial. Reproductive Biomedicine online. 2008; Vol 16 No 6: 835-841</p> <p>6. Setti et al. Intracytoplasmic sperm injection outcome versus intracytoplasmic morphologically selected sperm injection outcome: a meta-analysis. Reproductive BioMedicine Online, Volume 21, Issue 4; pp. 450-455</p> | <p>Bartoov B, Berkovitz A, Eltes F, Kogosowski A, Menezo Y, Barak Y. Real-Time fine morphology of motile human sperm cells is associated with IVFICSI outcome..J Androly 2002; 23:1-8</p> <p>Bartoov B, Berkovitz A, Eltes F, Kogosowski A, Menezo Y, Barak Y Pregnancy rates are higher with intracytoplasmic morphologically selected sperm injection than with conventional intracytoplasmic injection.Fertil Steril 2003 Dec;80(6):1413-9. Antinori M, Licata E, Dani G, Cerusico F, Versaci C, d'Angelo D, Antinori S. Intracytoplasmic morphologically selected sperm injection: a prospective randomized trial. Reproductive Biomedicine online. 2008; Vol 16 No 6: 835-841</p> <p>Souza Setti A, Ferreira RC, Paes de Almeida Ferreira Braga D, de Cássia Sávio Figueira R, Iaconelli A Jr, Borges E Jr. Intracytoplasmic sperm injection outcome versus intracytoplasmic morphologically selected sperm injection outcome: a meta-analysis. Reprod Biomed Online. 2010 Oct;21(4):450-5. doi: 10.1016/j.rbmo.2010.05.017. Epub 2010 Jun 19.</p> | <p>Prospective observational study, non-randomised parallel group intervention study, RCT, meta-analysis</p> | 1a                                             |
| Endometrial scratching | ID 25   | <p>web link to Nastri CO, Lensen SF, Gibreel A, Raine-Fenning N, Ferriani RA, Bhattacharya S, Martins WP. Endometrial injury in women undergoing assisted reproductive techniques. Cochrane Database of Systematic Reviews 2015, Issue 3. Art. No.: CD009517. DOI: 10.1002/14651858.CD009517.pub3.</p>                                                                                                                                                                                                                                                                                                                                                                                                                                                                                                                                                                                                                  | <p>Nastri CO, Lensen SF, Gibreel A, Raine-Fenning N, Ferriani RA, Bhattacharya S, Martins WP. Endometrial injury in women undergoing assisted reproductive techniques. Cochrane Database of Systematic Reviews 2015, Issue 3. Art. No.: CD009517. DOI: 10.1002/14651858.CD009517.pub3.</p>                                                                                                                                                                                                                                                                                                                                                                                                                                                                                                                                                                                                                                                                                                                                                              | <p>Systematic review</p>                                                                                     | 1a                                             |
|                        | ID 39   | <p>a Cochrane review (CD009517)</p>                                                                                                                                                                                                                                                                                                                                                                                                                                                                                                                                                                                                                                                                                                                                                                                                                                                                                     | <p>Nastri CO, Lensen SF, Gibreel A, Raine-Fenning N, Ferriani RA, Bhattacharya S, Martins WP. Endometrial injury in women undergoing assisted reproductive techniques. Cochrane Database of Systematic Reviews 2015, Issue 3. Art. No.: CD009517. DOI: 10.1002/14651858.CD009517.pub3.</p>                                                                                                                                                                                                                                                                                                                                                                                                                                                                                                                                                                                                                                                                                                                                                              | <p>Systematic review</p>                                                                                     | 1a                                             |
|                        | ID 62   | <p>Endometrial injury to overcome recurrent embryo implantation failure: a systematic review and meta-analysis. Potdar N, Gelbaya T, Nardo LG. Reprod Biomed Online. 2012 Dec;25(6):561-71</p>                                                                                                                                                                                                                                                                                                                                                                                                                                                                                                                                                                                                                                                                                                                          | <p>Potdar N, Gelbaya T, Nardo LG. Endometrial injury to overcome recurrent embryo implantation failure: a systematic review and meta-analysis. Reprod Biomed Online. 2012 Dec;25(6):561-71</p>                                                                                                                                                                                                                                                                                                                                                                                                                                                                                                                                                                                                                                                                                                                                                                                                                                                          | <p>Systematic review</p>                                                                                     | 1a                                             |
|                        | ID 71   | <p>Karimzadh MA et al . Endometrial local injury improves the pregnancy rate among recurrent implantation failure patients undergoing in vitro fertilisation/intra cytoplasmic sperm injection:a randomised clinical trial. Aust N Z J Obstet Gynaecol. 2009 Dec;49(6):677-80; Zhou L et al. Local injury to the endometrium in controlled ovarian hyper stimulation cycles improves implantation rates. Fertil Steril. 2008 May;89(5):1166-76; Barash A et Al. Local injury to the endometrium doubles the incidence of</p>                                                                                                                                                                                                                                                                                                                                                                                            | <p>Karimzadh MA et al. Endometrial local injury improves the pregnancy rate among recurrent implantation failure patients undergoing in vitro fertilisation/intra cytoplasmic sperm injection:a randomised clinical trial. Aust N Z J Obstet Gynaecol. 2009 Dec;49(6):677-80; Zhou L, Li R, Wang R, Huang HX, Zhong K. Local injury to the endometrium in controlled ovarian hyper stimulation cycles improves implantation rates. Fertil Steril. 2008 May;89(5):1166-76; Barash A, Dekel N, Fieldust S, Segal I,</p>                                                                                                                                                                                                                                                                                                                                                                                                                                                                                                                                   |                                                                                                              | 1c                                             |

|                                                        |       |                                                                                                                                                                                                                                                                                                                                                                                                                                                                                                                                   |                                                                                                                                                                                                                                                                                                                                                                                                                                                                                                                                                                                                  |                            |    |
|--------------------------------------------------------|-------|-----------------------------------------------------------------------------------------------------------------------------------------------------------------------------------------------------------------------------------------------------------------------------------------------------------------------------------------------------------------------------------------------------------------------------------------------------------------------------------------------------------------------------------|--------------------------------------------------------------------------------------------------------------------------------------------------------------------------------------------------------------------------------------------------------------------------------------------------------------------------------------------------------------------------------------------------------------------------------------------------------------------------------------------------------------------------------------------------------------------------------------------------|----------------------------|----|
|                                                        |       | successful pregnancies in patients undergoing in vitro fertilization. .Fertil Steril. 2003 Jun;79(6):1317-22 Gnainsky Y et al. Local injury of the endometrium induces an inflammatory response that promotes successful implantation. Fertil Steril 2010 Nov;94(6):2030-6                                                                                                                                                                                                                                                        | Schechtman E, Granot I. Local injury to the endometrium doubles the incidence of successful pregnancies in patients undergoing in vitro fertilization. Fertil Steril. 2003 Jun;79(6):1317-22; Gnainsky Y et al. Local injury of the endometrium induces an inflammatory response that promotes successful implantation. Fertil Steril 2010 Nov;94(6):2030-6                                                                                                                                                                                                                                      |                            |    |
| Embryogluce                                            | ID 24 | A literature study by the independent research institute Cochrane Collaboration covering all published results on the effects of increased hyaluronan during embryo transfer                                                                                                                                                                                                                                                                                                                                                      | Bontekoe S, Blake D, Heineman MJ, Williams EC, Johnson N. Adherence compounds in embryo transfer media for assisted reproductive technologies. Cochrane Database Syst Rev. 2010;7:CD007421                                                                                                                                                                                                                                                                                                                                                                                                       | Systematic review          | 1a |
|                                                        | ID 25 | according to a newly published meta-analysis from the independent research network Cochrane Collaboration                                                                                                                                                                                                                                                                                                                                                                                                                         | Bontekoe S, Blake D, Heineman MJ, Williams EC, Johnson N. Adherence compounds in embryo transfer media for assisted reproductive technologies. Cochrane Database Syst Rev. 2010;7:CD007421                                                                                                                                                                                                                                                                                                                                                                                                       | Systematic review          | 1a |
|                                                        | ID 46 | Sun et al 2010                                                                                                                                                                                                                                                                                                                                                                                                                                                                                                                    | Sun HX, Hu YL, Zhang NY, Wang B. A retrospective clinical study on effects of hyaluronan-containing transfer medium on implantation, pregnancy and delivery. IFFS 2010 (conference poster abstract, available at <a href="http://www.kup.at/kup/pdf/9085.pdf">http://www.kup.at/kup/pdf/9085.pdf</a> , page 66/147)                                                                                                                                                                                                                                                                              | Retrospective cohort study | 2b |
|                                                        | ID 51 | The Cochrane Collaboration, an independent research institute, published results on the effects of increased hyaluronan during embryo transfer... Retrospective study 2004-2008 comparing EmbryoGlue® with a conventional transfer medium for ~1300 patients. Ref: Sun et al. IFFS 2010 Retrospective study 2004-2008 comparing EmbryoGlue® with a conventional transfer medium for ~1300 patients. Ref: Sun et al. IFFS 2010 and also [shows second bar chart] Ref: B Balaban Am Hosp. Ass Rep Unit, Istanbul, Turkey ESHRE 2004 | Bontekoe S, Blake D, Heineman MJ, Williams EC, Johnson N. Adherence compounds in embryo transfer media for assisted reproductive technologies. Cochrane Database Syst Rev. 2010;7:CD007421; Sun HX, Hu YL, Zhang NY, Wang B. A retrospective clinical study on effects of hyaluronan-containing transfer medium on implantation, pregnancy and delivery. IFFS 2010 (conference poster abstract, available at <a href="http://www.kup.at/kup/pdf/9085.pdf">http://www.kup.at/kup/pdf/9085.pdf</a> , page 66/147) Balaban et al. 2004 not found (online archive for ESHRE not available for 2004). | Systematic review          | 1a |
|                                                        | ID 62 | A literature study by the independent research institute "Cochrane Collaboration" covering all published results on the effects of increased hyaluronan during embryo transfer                                                                                                                                                                                                                                                                                                                                                    | Bontekoe S, Blake D, Heineman MJ, Williams EC, Johnson N. Adherence compounds in embryo transfer media for assisted reproductive technologies. Cochrane Database Syst Rev. 2010;7:CD007421                                                                                                                                                                                                                                                                                                                                                                                                       | Systematic review          | 1a |
|                                                        | ID 71 | Bontekoe S, Blake D, Heineman MJ, Williams EC, Johnson N. Adherence compounds in embryo transfer media for assisted reproductive technologies. Cochrane Database Syst Rev. 2010;7:CD007421                                                                                                                                                                                                                                                                                                                                        | Bontekoe S, Blake D, Heineman MJ, Williams EC, Johnson N. Adherence compounds in embryo transfer media for assisted reproductive technologies. Cochrane Database Syst Rev. 2010;7:CD007421                                                                                                                                                                                                                                                                                                                                                                                                       | Systematic review          | 1a |
| Assisted hatching                                      | ID 39 | International Review of the effectiveness of Assisted hatching (conducted in 2009).                                                                                                                                                                                                                                                                                                                                                                                                                                               | Das S, Blake D, Farquhar C, Seif MM. Assisted hatching on assisted conception (IVF and ICSI). Cochrane Database Syst Rev. 2009 Apr 15;(2):CD001894. doi: 10.1002/14651858.CD001894.pub4. Review. Update in: Cochrane Database Syst Rev. 2012;12:CD001894.                                                                                                                                                                                                                                                                                                                                        | Systematic review          | 1a |
| Vitrification of human eggs and embryos/EVES technique | ID 25 | A recent review of obstetric and perinatal outcomes in 200 infants conceived following egg vitrification cycles Chian et al. 2008 Reprod. Med Online 16:608-610.                                                                                                                                                                                                                                                                                                                                                                  | Chian RC, Huang JY, Tan SL, Lucena E, Saa A, Rojas A, Ruvalcaba Castellón LA, García Amador MI, Montoya Sarmiento JE. Obstetric and perinatal outcome in 200 infants conceived from vitrified oocytes. Reprod Biomed Online. 2008 May;16(5):608-10.                                                                                                                                                                                                                                                                                                                                              | Case series                | 2b |
| Embryoscope                                            | ID 25 | links to pdf of published paper <a href="http://www.fertstert.org/article/S0015-0282(12)02068-7/pdf">http://www.fertstert.org/article/S0015-0282(12)02068-7/pdf</a>                                                                                                                                                                                                                                                                                                                                                               | Meseguer M1, Rubio I, Cruz M, Basile N, Marcos J, Requena A. Embryo incubation and selection in a time-lapse monitoring system improves pregnancy outcome compared with a standard incubator:a retrospective cohort study. Fertil Steril. 2012 Dec;98(6):1481-9.e10. doi: 10.1016/j.fertnstert.2012.08.016. Epub 2012 Sep 10.                                                                                                                                                                                                                                                                    | Retrospective cohort study | 2b |

\* CEBM levels of evidence for therapeutic interventions (<http://www.cebm.net/oxford-centre-evidence-based-medicine-levels-evidence-march-2009/>)

- a SR (with homogeneity\*) of RCTs
- 1b Individual RCT (with narrow Confidence Interval”i)
- 1c All or none§
- 2a SR (with homogeneity\*) of cohort studies
- 2b Individual cohort study (including low quality RCT; e.g., <80% follow-up)
- 2c “Outcomes” Research; Ecological studies
- 3a SR (with homogeneity\*) of case-control studies
- 3b Individual Case-Control Study
- 4 Case-series (and poor quality cohort and case-control studies§§)
- 5 Expert opinion without explicit critical appraisal, or based on physiology, bench research or “first principles”
